# Supplementary material
Source: PubMed Central journal article supplement (PMC5373505)
Supplement: jnm176115SupplementaryData.pdf [file jnm176115SupplementaryData.pdf]

Supplemental Table 1. Slow accumulating regions

| Regions                              | Rank of slope | slope | Rank of AAR | AAR (mean±SD)  | Volume (mm <sup>3</sup> ) |
|--------------------------------------|---------------|-------|-------------|----------------|---------------------------|
| Hippocampus_L                        | 1             | 0     | 3           | -0.0184±0.0400 | 1626                      |
| Thalamus_R                           | 2             | 0.03  | 5           | -0.0004±0.0383 | 5676                      |
| Thalamus_L                           | 3             | 0.03  | 4           | -0.0015±0.0352 | 5452                      |
| Caudate nucleus_R                    | 4             | 0.04  | 1           | -0.0256±0.0515 | 3411                      |
| Hippocampus_R                        | 5             | 0.05  | 7           | 0.0027±0.0454  | 1825                      |
| Caudate nucleus_L                    | 6             | 0.07  | 2           | -0.0244±0.0600 | 3456                      |
| Parahippocampal and ambient gyri_R   | 7             | 0.13  | 8           | 0.0057±0.051   | 3583                      |
| Amygdala_R                           | 8             | 0.20  | 6           | 0.0026±0.0500  | 1057                      |
| Amygdala_L                           | 9             | 0.20  | 9           | 0.0082±0.0535  | 1120                      |
| Parahippocampal and ambient gyri_L   | 10            | 0.28  | 10          | 0.0096±0.0566  | 3595                      |
| Putamen_R                            | 11            | 0.52  | 27          | 0.0292±0.0367  | 4063                      |
| Anterior superior temporal gyrus_R   | 12            | 0.53  | 15          | 0.0159±0.0541  | 4205                      |
| Insula_R                             | 13            | 0.55  | 23          | 0.0222±0.0335  | 12323                     |
| Insula_L                             | 14            | 0.55  | 20          | 0.0216±0.0381  | 12275                     |
| Putamen_L                            | 15            | 0.56  | 26          | 0.0287±0.0397  | 3957                      |
| Medial anterior temporal lobe_L      | 16            | 0.58  | 11          | 0.0114±0.0461  | 4975                      |
| Posterior orbital gyrus_R            | 17            | 0.61  | 22          | 0.0221±0.0452  | 4476                      |
| Lateral orbital gyrus_L              | 18            | 0.63  | 13          | 0.0141±0.0690  | 3328                      |
| Anterior superior temporal gyrus_L   | 19            | 0.66  | 12          | 0.0134±0.0558  | 4033                      |
| Medial anterior temporal lobe_R      | 20            | 0.71  | 14          | 0.0151±0.0458  | 5107                      |
| Lateral anterior temporal lobe_R     | 21            | 0.75  | 18          | 0.0204±0.0766  | 2842                      |
| Lateral orbital gyrus_R              | 22            | 0.75  | 16          | 0.0181±0.0662  | 2967                      |
| Straight gyrus_L                     | 23            | 0.75  | 25          | 0.0268±0.0630  | 3142                      |
| Fusiform gyrus_L                     | 24            | 0.76  | 17          | 0.0199±0.050   | 3486                      |
| Fusiform gyrus_R                     | 25            | 0.79  | 19          | 0.0210±0.0520  | 3479                      |
| Posterior orbital gyrus_L            | 26            | 0.80  | 21          | 0.0217±0.0530  | 4594                      |
| Straight gyrus_R                     | 27            | 0.81  | 29          | 0.0300±0.0552  | 2856                      |
| Medial orbital gyrus_R               | 28            | 0.87  | 40          | 0.0389±0.0590  | 4962                      |
| Lateral anterior temporal lobe_L     | 29            | 0.88  | 24          | 0.0254±0.0716  | 2856                      |
| Precentral gyrus_R                   | 30            | 0.88  | 37          | 0.0380±0.0452  | 27438                     |
| Medial orbital gyrus_L               | 31            | 0.93  | 39          | 0.0386±0.0594  | 4780                      |
| Middle and inferior temporal gyrus_L | 32            | 0.93  | 36          | 0.0377±0.0418  | 13115                     |
| Precentral gyrus_L                   | 33            | 0.95  | 43          | 0.0401±0.0420  | 28237                     |
| Middle and inferior temporal gyrus_R | 34            | 0.97  | 33          | 0.0357±0.0401  | 13452                     |
| Lingual gyrus_R                      | 35            | 0.98  | 32          | 0.0355±0.0481  | 11970                     |

|                                  |    |   |    |               |        |
|----------------------------------|----|---|----|---------------|--------|
| <b>Posterior temporal lobe_R</b> | 36 | 1 | 35 | 0.0376±0.0395 | 43594  |
| <b>Whole-GM</b>                  | 37 | 1 | 38 | 0.0386±0.0321 | 851002 |

Note: ‘\_L’ and ‘\_R’ indicate left and right, respectively. Abbreviations: AAR = annual accumulation rate; Whole-GM = whole brain gray matter.
